# Supplementary material for: Colorimetric detection of Hg2+ and Pb2+ based on peroxidase-like activity of graphene oxide–gold nanohybrids
Source: Royal Society of Chemistry journal article supplement (doi:10.1039/c4ay02801e), 2015-01-01
Supplement: c4ay02801e1.pdf [file c4ay02801e1.pdf]

## Colorimetric detection of Hg<sup>2+</sup> and Pb<sup>2+</sup> based on peroxidase-like activity of graphene oxide-gold nanohybrids

Xia Chen<sup>1,2</sup>, Huina Zhou<sup>1,\*</sup>, John Hugh Snyder<sup>1</sup>, Qiansi Chen<sup>1</sup>, Niu Zhai<sup>1</sup>, Pingping Liu<sup>1</sup>, Lifeng Jin<sup>1</sup>, Qingxia Zheng<sup>1</sup>, Fucheng Lin<sup>1</sup>, Jiming Hu<sup>2</sup>

According to the Lineweaver-Burk equation<sup>1</sup> ( $V = V_{\max}C/(K_m+C)$ , where  $V$  is the initial velocity,  $V_{\max}$  is the maximal reaction velocity,  $C$  is the concentration of the substrate, and  $K_m$  is the Michaelis constant), the apparent Michaelis constant ( $K_m$ ) and the maximal reaction velocity ( $V_{\max}$ ), considered to be the characteristics of enzyme reaction kinetics, were obtained and shown in Table S1.

Table S1. Comparison of the kinetic parameters of GO-AuNP nanohybrids and HRP.

|                     | substrate | $K_m$ (mM) | $V_{\max}$ (nM s <sup>-1</sup> ) |
|---------------------|-----------|------------|----------------------------------|
| GO-AuNP nanohybrids | TMB       | 4.92       | 46.43                            |
| HRP <sup>2</sup>    | TMB       | 0.43       | 100.00                           |

Table S2 Gold nanoparticle probes for colorimetric detection of Hg<sup>2+</sup> and Pb<sup>2+</sup>.

| Probe                            | Target           | LOD    | Time    | Real sample | Ref.       |
|----------------------------------|------------------|--------|---------|-------------|------------|
| DNA-AuNPs                        | Hg <sup>2+</sup> | 100 nM | 10 min  | —           | 2          |
| MPA-AuNPs                        | Hg <sup>2+</sup> | 100 nM | 1 h     | —           | 3          |
| MPA-homocysteine-AuNPs           | Hg <sup>2+</sup> | 10 nM  | 30 min  | —           | 4          |
| Apt/AuNPs                        | Hg <sup>2+</sup> | 1.0 μM | 5.0 min | —           | 5          |
| GO-AuNP nanohybrids              | Hg <sup>2+</sup> | 300 nM | 30 min  | River water | this study |
| Peptide-AuNPs                    | Pb <sup>2+</sup> | 242 nM | 1.0 min | —           | 6          |
| DNA-AuNPs, DNAzyme and substrate | Pb <sup>2+</sup> | 10 μM  | 10 min  | —           | 7          |
| DNA-AuNPs, DNAzyme and substrate | Pb <sup>2+</sup> | 0.5 μM | 15 min  | Paint       | 8          |
| DNA-AuNPs, DNAzyme and substrate | Pb <sup>2+</sup> | 0.4 μM | 8.0 min | —           | 9          |
| GO-AuNP nanohybrids              | Pb <sup>2+</sup> | 500 nM | 30 min  | River water | this study |

[1] A. Higuchi, Y. D. Siao, S. T. Yang, P. V. Hsieh, H. Fukushima, Y. Chang, R. C. Ruaan, W. Y. Chen, *Anal. Chem.*, 2008, **80**, 6580-6586.

[2] J. S. Lee, M. S. Han, C. A. Mirkin, *Angew. Chem. Int.*, 2007, **46**, 4093-4096.

[3] C. C. Huang, H. T. Chang, *Chem. Commun.*, 2007, 1215-1217.

- [4] Z. Q. Tan, J. F. Liu, R. Liu, Y. G. Yin, G. B. Jiang, *Chem. Commun.*, 2009, 7030-7032.
- [5] X. Xue, F. Wang, X. Liu, *J. Am. Chem. Soc.*, 2008, **130**, 3244-3245.
- [6] J. M. Slocik, J. S. Zabiniski, Jr., D. M. Phillips, R. R. Naik, *Small*, 2008, **4**, 548-551.
- [7] W. Zhao, J. C. Lam, W. Chiuman, M. A. Brook, Y. Li, *Small*, 2008, **4**, 810-816.
- [8] D. Mazumdar, J. Liu, G. Lu, J. Zhou, Y. Lu, *Chem. Commun.*, 2010, **46**, 1416-1418.
- [9] J. Liu, Y. Lu, *J. Am. Chem. Soc.*, 2004, **126**, 12298-12305.
